# Supplementary material for: Bye-bye, bye advantage: estimating the competitive impact of rest differential in the National Football League
Source: Frontiers journal article supplement (doi:10.3389/frbhe.2024.1479832), 2024-10-17
Supplement: Data_Sheet_1.pdf [file Data_Sheet_1.pdf]

# Bye-Bye, Bye Advantage: Estimating the competitive impact of rest differential in the National Football League (SUPPLEMENT)

**Michael J. Lopez<sup>1,\*</sup> and Thompson Bliss<sup>2</sup>**

<sup>1</sup>*National Football League, New York, USA*

<sup>2</sup>*National Football League, New York, USA*

Correspondence\*:

Michael Lopez

Michael.Lopez@nfl.com

## APPENDIX

### Trace Plot - Point Differential Impact (Model 1, constant Bye Advantage effect)

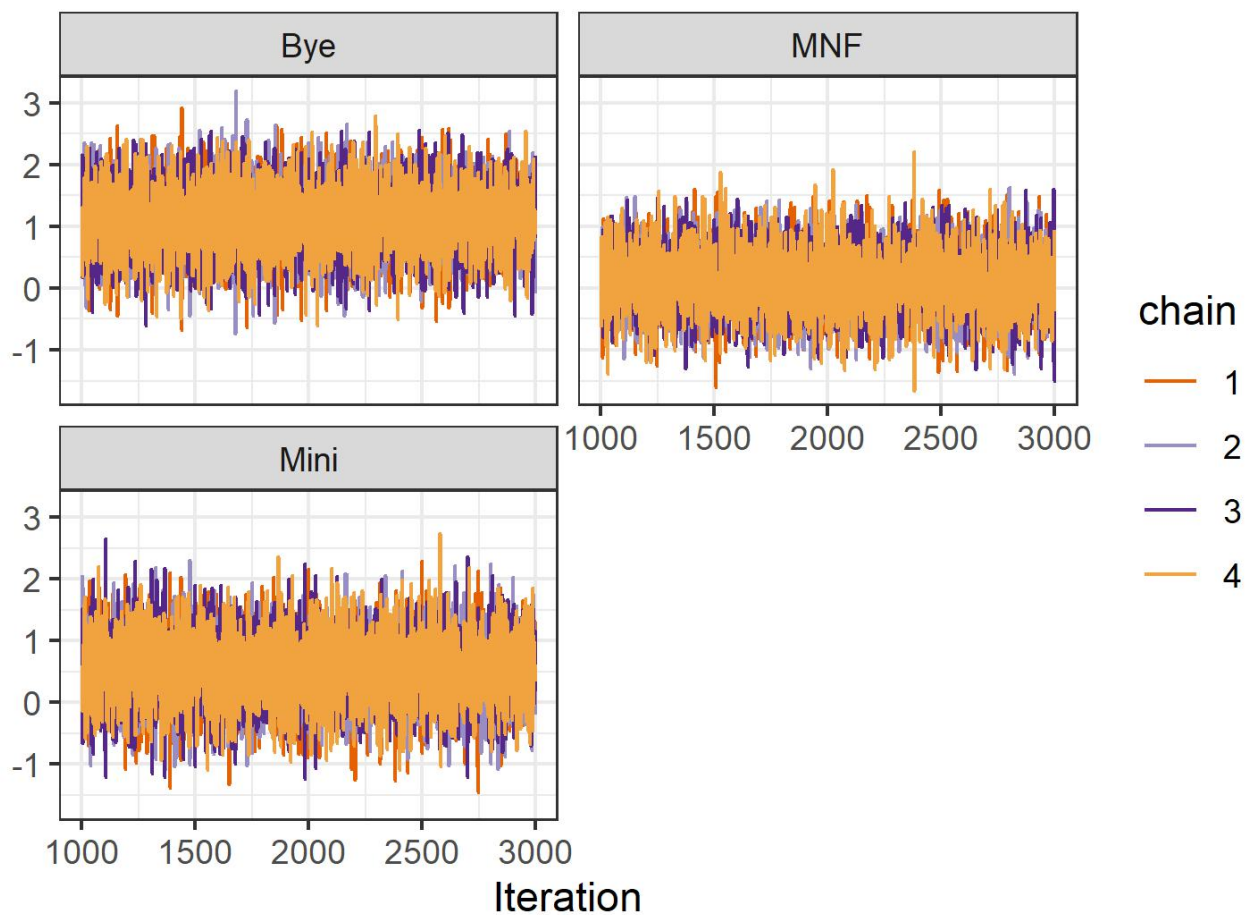

**Figure 1.** Trace plot for each rest parameter of interest for Model ???. There is no evidence of a lack of convergence.

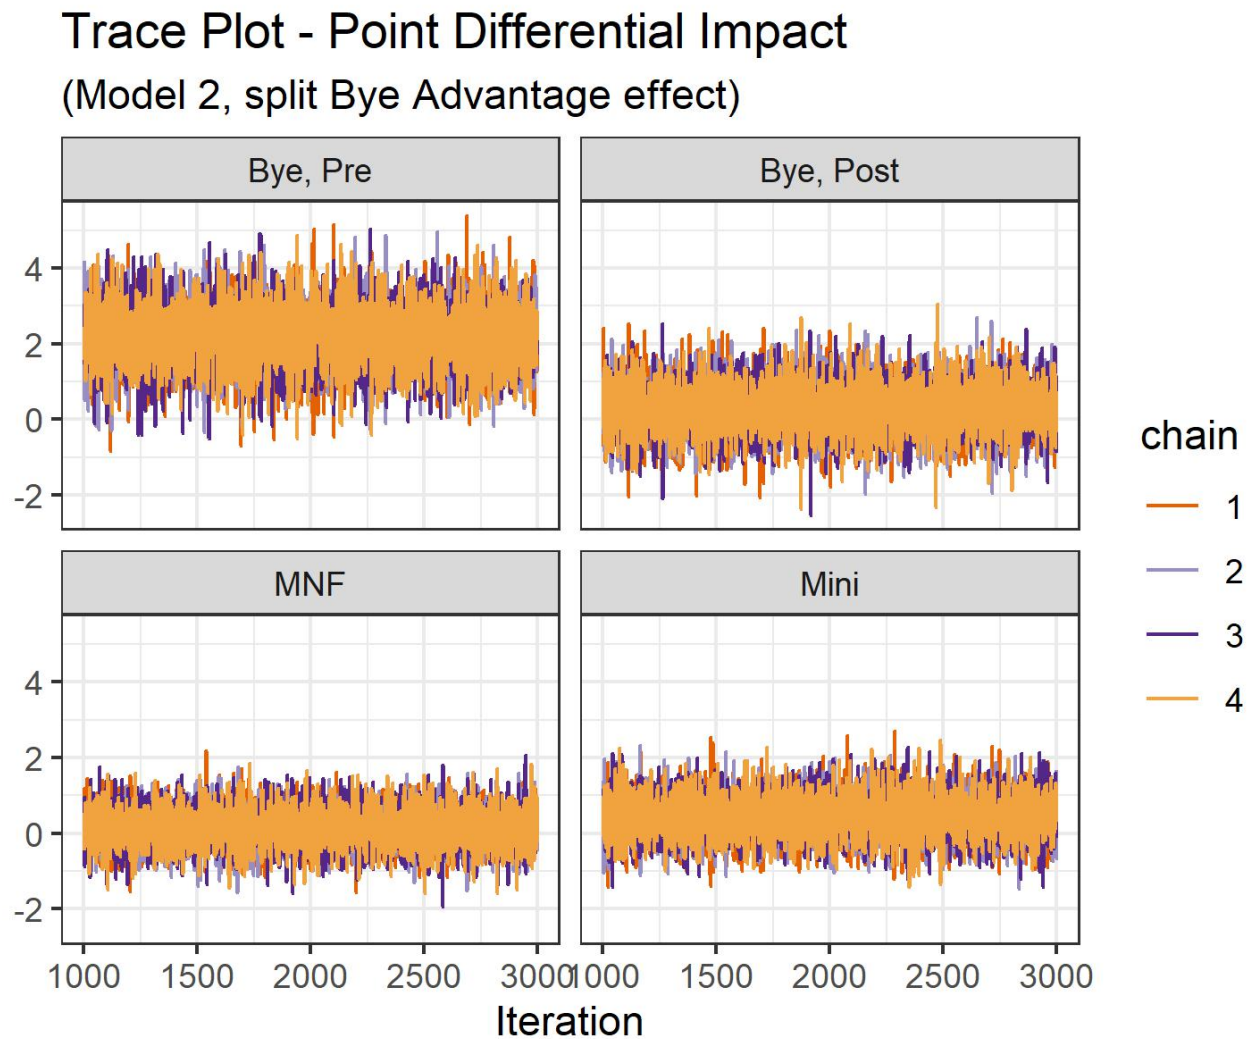

**Figure 2.** Trace plot for each rest parameter of interest for Model ???. There is no evidence of a lack of convergence.

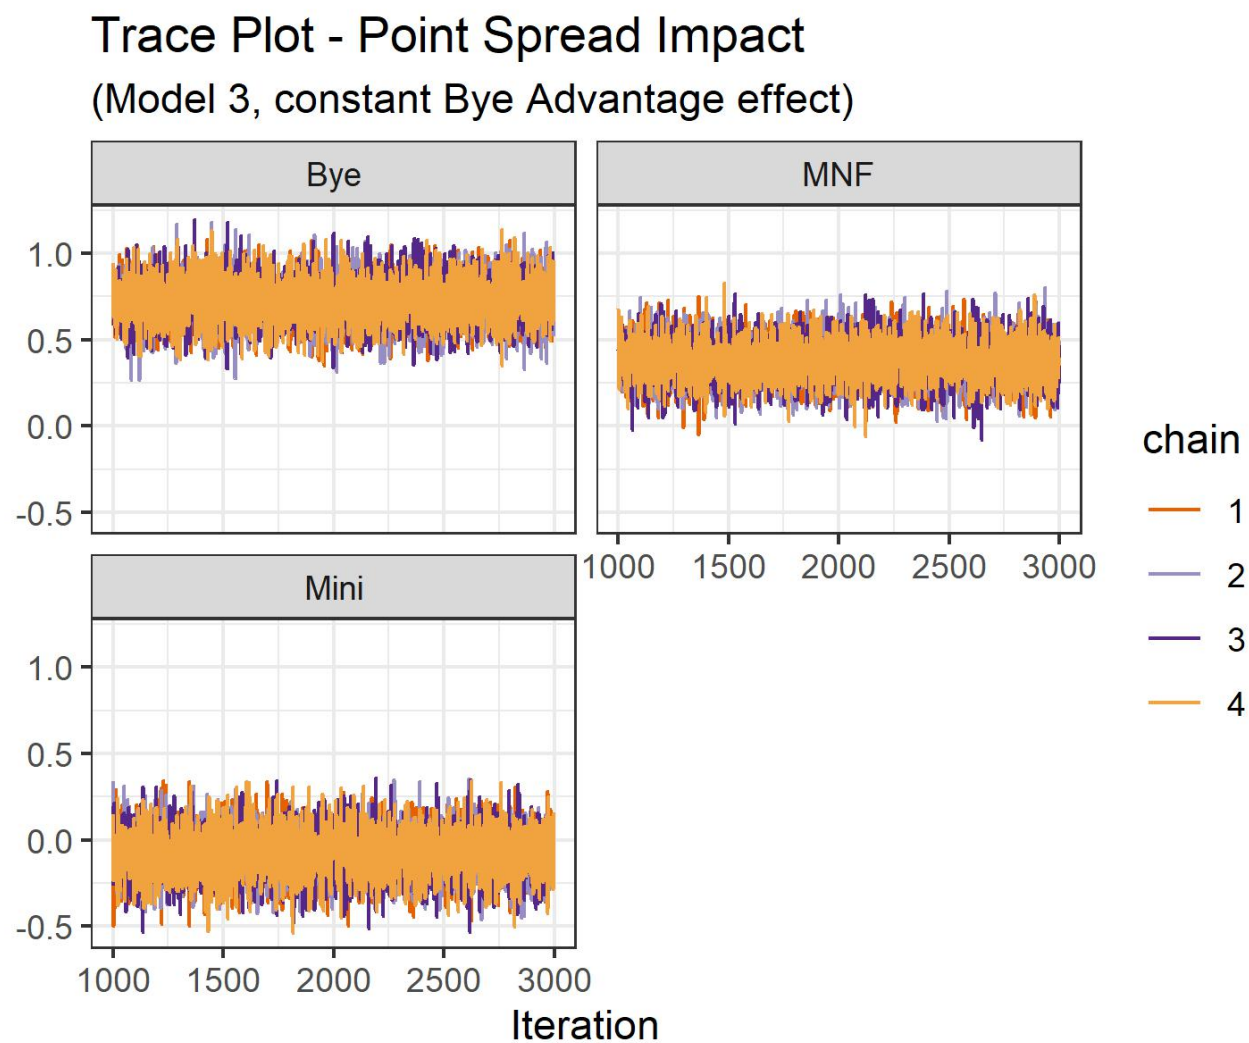

**Figure 3.** Trace plot for each rest parameter of interest for Model ???. There is no evidence of a lack of convergence.

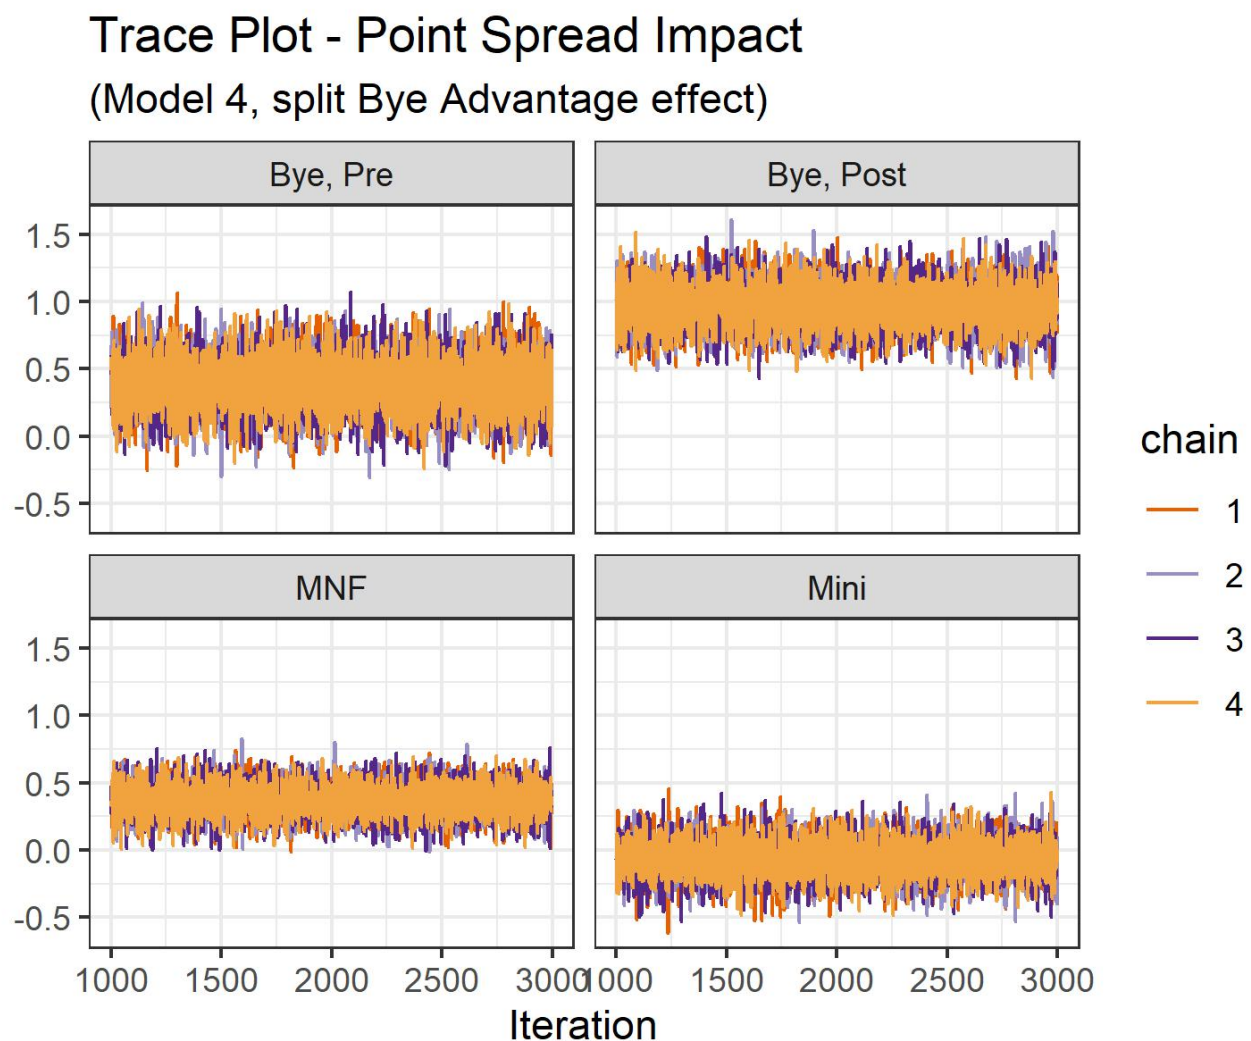

**Figure 4.** Trace plot for each rest parameter of interest for Model ???. There is no evidence of a lack of convergence.

| Season | Week | Home Team | Away Team | Drop Reason            |
|--------|------|-----------|-----------|------------------------|
| 2010   | 16   | PHI       | MIN       | Rescheduled            |
| 2010   | 17   | DET       | MIN       | Game After Rescheduled |
| 2010   | 17   | PHI       | DAL       | Game After Rescheduled |
| 2020   | 4    | KC        | NE        | Rescheduled            |
| 2020   | 5    | KC        | LV        | Game After Rescheduled |
| 2020   | 5    | TEN       | BUF       | Rescheduled            |
| 2020   | 6    | MIA       | NYJ       | Rescheduled            |
| 2020   | 6    | TEN       | HOU       | Game After Rescheduled |
| 2020   | 6    | BUF       | KC        | Rescheduled            |
| 2020   | 6    | NE        | DEN       | Rescheduled            |
| 2020   | 7    | LAC       | JAX       | Rescheduled            |
| 2020   | 7    | DEN       | KC        | Game After Rescheduled |
| 2020   | 7    | NE        | SF        | Game After Rescheduled |
| 2020   | 7    | NYJ       | BUF       | Game After Rescheduled |
| 2020   | 7    | TEN       | PIT       | Rescheduled            |
| 2020   | 8    | DEN       | LAC       | Rescheduled            |
| 2020   | 8    | CIN       | TEN       | Game After Rescheduled |
| 2020   | 8    | MIA       | LA        | Game After Rescheduled |
| 2020   | 8    | BAL       | PIT       | Rescheduled            |
| 2020   | 9    | DAL       | PIT       | Game After Rescheduled |
| 2020   | 9    | LAC       | LV        | Game After Rescheduled |
| 2020   | 9    | ATL       | DEN       | Game After Rescheduled |
| 2020   | 9    | IND       | BAL       | Game After Rescheduled |
| 2020   | 9    | JAX       | HOU       | Game After Rescheduled |
| 2020   | 10   | MIA       | LAC       | Rescheduled            |
| 2020   | 11   | DEN       | MIA       | Rescheduled            |
| 2020   | 11   | LAC       | NYJ       | Rescheduled            |
| 2020   | 12   | DEN       | NO        | Game After Rescheduled |
| 2020   | 12   | BUF       | LAC       | Game After Rescheduled |
| 2020   | 12   | NYJ       | MIA       | Game After Rescheduled |
| 2020   | 12   | PIT       | BAL       | Rescheduled            |
| 2020   | 13   | PIT       | WAS       | Rescheduled            |
| 2020   | 13   | BAL       | DAL       | Rescheduled            |
| 2020   | 14   | CLE       | BAL       | Game After Rescheduled |
| 2020   | 14   | BUF       | PIT       | Game After Rescheduled |
| 2020   | 14   | SF        | WAS       | Game After Rescheduled |
| 2020   | 14   | CIN       | DAL       | Game After Rescheduled |
| 2021   | 15   | TB        | NO        | Game After Rescheduled |
| 2021   | 15   | LA        | SEA       | Rescheduled            |
| 2021   | 15   | JAX       | HOU       | Game After Rescheduled |
| 2021   | 15   | PIT       | TEN       | Game After Rescheduled |
| 2021   | 15   | PHI       | WAS       | Rescheduled            |
| 2021   | 15   | CLE       | LV        | Rescheduled            |
| 2021   | 16   | PHI       | NYG       | Game After Rescheduled |
| 2021   | 16   | LV        | DEN       | Game After Rescheduled |
| 2021   | 16   | MIN       | LA        | Game After Rescheduled |
| 2021   | 16   | DAL       | WAS       | Game After Rescheduled |
| 2021   | 16   | SEA       | CHI       | Game After Rescheduled |
| 2021   | 16   | GB        | CLE       | Game After Rescheduled |
| 2022   | 17   | CIN       | BUF       | Cancelled              |
| 2022   | 18   | BUF       | NE        | Game After Cancelled   |
| 2022   | 18   | CIN       | BAL       | Game After Cancelled   |

**Table 1.** Games dropped from our analysis, as well as the explanation. Most games dropped were due to schedule changes during the Covid-19 pandemic. These games, as well as each of the ensuing games for each team, do not reflect typical NFL practice and rest schedules.
